# Supplementary material for: Exploring the social-ecological potential for indigenous agroforestry in peri-urban areas: a participatory mapping approach
Source: Research Square preprint supplement (doi:10.21203/rs.3.rs-6970205/v1), 2025-07-14
Supplement: Supplementary file 1 [file 723f3e9ba54571f2fb918823.docx]

## Appendix

**Table A1: List of fruit tree species reported at Maphephetheni (M), Ntshongweni (N), and Osindisweni (O), with * indicating indigenous species**

| **#** | **Scientific name** | **Common name** | **isiZulu name** | **M** | **N** | **O** |
| --- | --- | --- | --- | --- | --- | --- |
| 1 | *Canthium inerme* | Turkeyberry* | iMvuthwamini |  |  |  |
| 2 | *Carissa sp.* | Numnum* | aMatangulu |  |  |  |
| 3 | *Ficus sur* | Boom cluster fig* | umKhiwane |  |  |  |
| 4 | *Harpephyllum caffrum* | Wildplum* | umGwenya |  |  |  |
| 5 | *Morus sp.* | Mulberry* | amaJigjolo |  |  |  |
| 6 | *Sclerocarya birrea* | Marula* | uMganu |  |  |  |
| 7 | *Searsia rehmanniana* | Blunt-leaved currant* | isiHlakothi |  |  |  |
| 8 | *Syzigium sp.* | Waterberry* | uMdoni |  |  |  |
| 9 | *Trichilia emetica* | Natal mahogany* | umKhuhlu |  |  |  |
| 10 | *Vangueria infausta* | African medlar* | umTulwa |  |  |  |
| 11 | *Ximenia caffra* | Sourplum* | umTunduluka |  |  |  |
| 12 | *Carica papaya* | Pawpaw | = |  |  |  |
| 13 | *Citrus limon* | Lemon | = |  |  |  |
| 14 | *Litchi chinensis* | Litchi | = |  |  |  |
| 15 | *Mangifera sp.* | Mango | = |  |  |  |
| 16 | *Musca domestica* | Banana | = |  |  |  |
| 17 | *Persea americana* | Avocado | = |  |  |  |
| 18 | *Prunus persica* | Peach | = |  |  |  |
| 19 | *Psidium guajava* | Guava | = |  |  |  |

**Table A2: Soil categories descriptions**

| **Soil Category** | **Characteristics** | **Reference** |
| --- | --- | --- |
| Haplic Acrisols (ACh) | Inherently infertile soils, that are quickly chemically and organically degraded when utilized. | (Tho & Hoa 2017) |
| Dystric Regosols (RGd) | Characterized by shallow, medium- to fine-textured, unconsolidated parent material of alluvial origin and the absence of a significant soil horizon formation due to dry or cold weather events. Regosols are used mostly for irrigation farming or low volume grazing. | (Hansson et al. 2011) |
| Dystric Leptosols (LPd) | Soils with a very shallow profile depth (indicating little influence of soil-forming processes), and they often contain large amounts of gravel. | (Anikwe 2000) |
| Haplic Phaeozems (PHh) | Porous, fertile soils suitable for intensive cropping High organic matter content, well aerated soils with moderate to strong structures. | (Bobrovskii 2010) |

**Table A3: Land capability groups and land use options**

| **Land use capability class** | **Land use options** | **Land capability groups** |
| --- | --- | --- |
| I  II  III  IV | W F LG MG IG LC MC IC VIC  W F LG MG IG LC MC IC  W F LG MG IG LC MC  W F LG MG IG LC | Arable land |
| V  VI  VII | W F LG MG  W F LG MG  W F LG | Grazing |
| VIII | W | Wildlife |
|  | W – Wildlife  F – Forestry  L – Light Grazing  MG – Moderate Grazing  IG – Intensive Grazing  LC - Poorly adapted cultivation  MC – Moderately well adapted cultivation  IC – Intensive, well adapted cultivation  VIC – Very intensive, well adapted cultivation |  |
